# Supplementary figures and images for: Potential Therapeutic Application and Mechanism of Action of Stem Cell-Derived Extracellular Vesicles (EVs) in Systemic Lupus Erythematosus (SLE)
Source: MDPI journal article supplement (doi:10.3390/ijms25042444), 2024-02-19

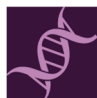

---

**Supplementary File S1** Schematic Representation of the Included Studies.

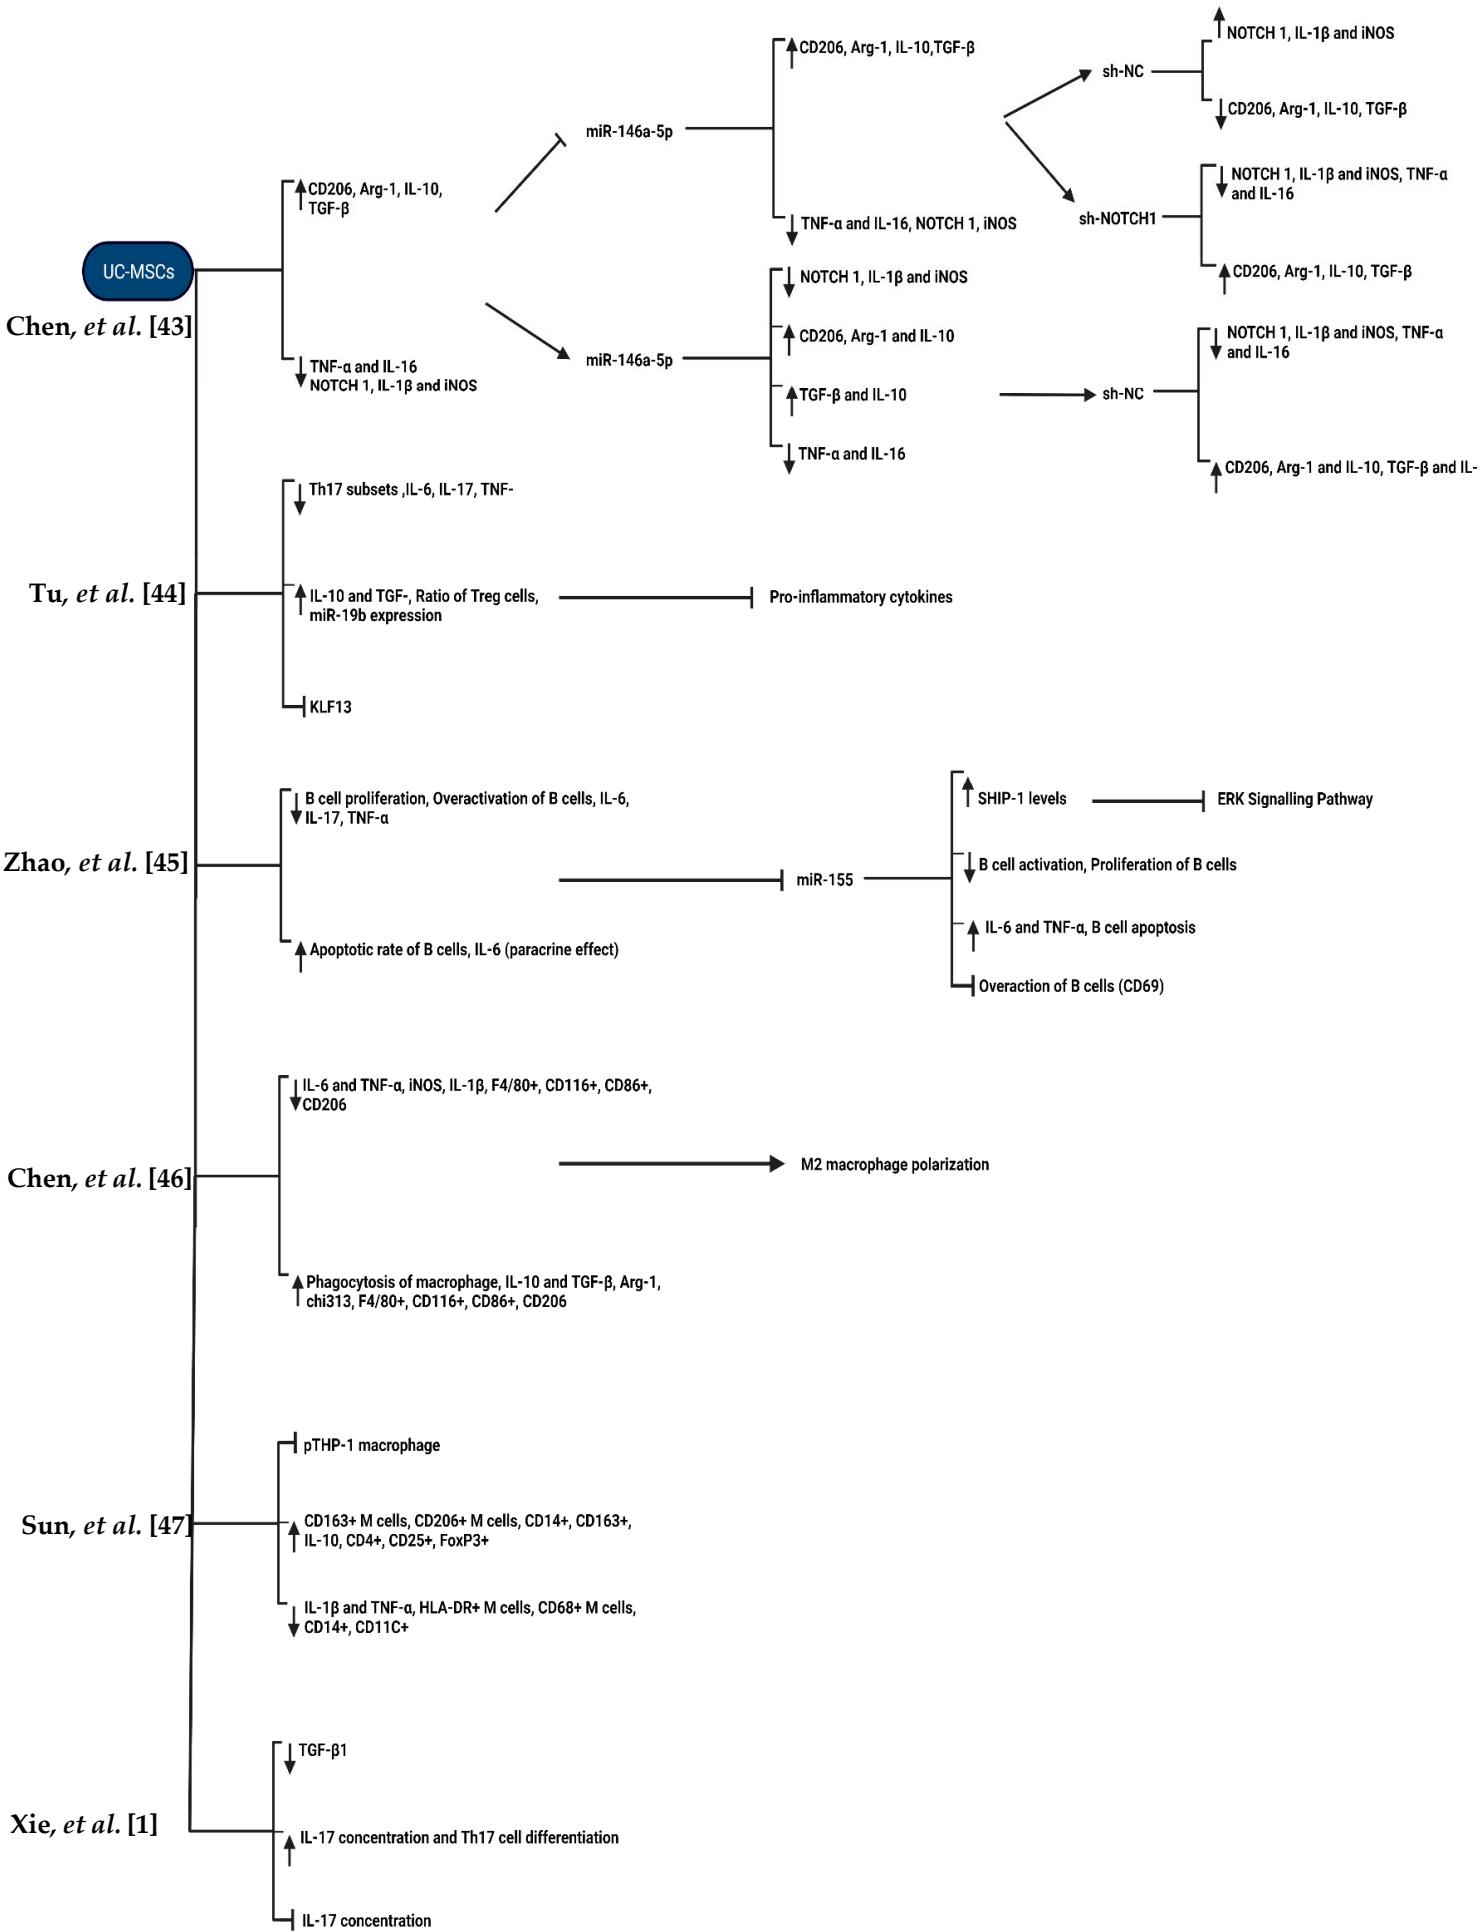

(continued)

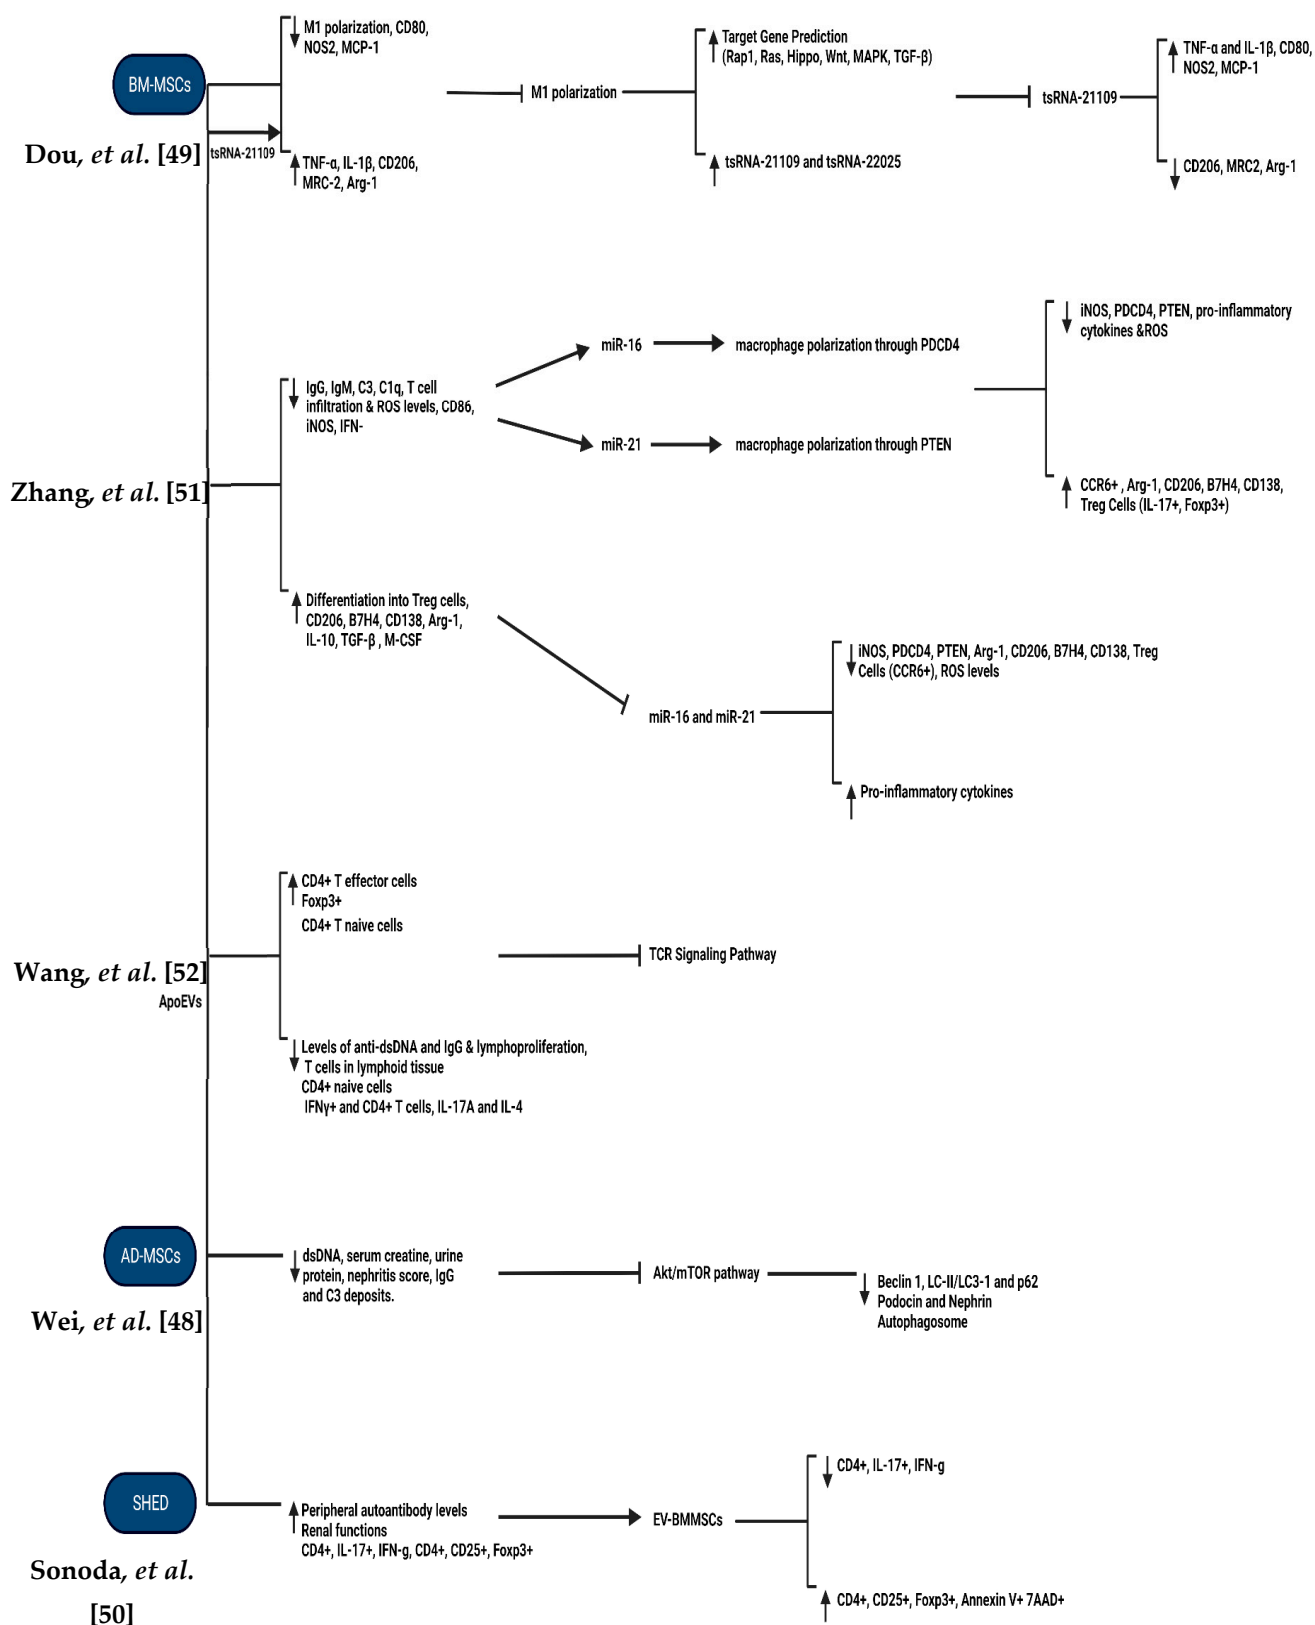

Supplement: s1 [file s1]
